# Supplementary material for: peri-Acenoacene molecules: tuning of the singlet and triplet excitation energies by modifying their radical character
Source: Royal Society of Chemistry journal article supplement (doi:10.1039/d1cp03232a), 2021-01-01
Supplement: d1cp03232a1.pdf [file d1cp03232a1.pdf]

–Supplementary Material–  
***peri*-Acenoacenes Molecules: Tuning of  
the Singlet and Triplet Excitation  
Energies by Modifying their Radical  
Character**

A. Omist<sup>a</sup>, G. Ricci<sup>b</sup>, A. Derradji<sup>a</sup>, A.J. Pérez-Jiménez<sup>a</sup>,  
E. San-Fabián<sup>a</sup>, Y. Olivier<sup>b</sup>, and J. C. Sancho-García<sup>a\*</sup>

<sup>a</sup> Department of Physical Chemistry,  
University of Alicante,  
E-03080 Alicante, Spain

<sup>b</sup> Unité de Chimie Physique Théorique et Structurale  
& Laboratoire de Physique du Solid,  
Namur Institute of Structured Matter,  
Université de Namur,  
B-5000 Namur, Belgium

September 23, 2021

---

\*E-mail: jc.sancho@ua.es

## Contents

|                                          |   |
|------------------------------------------|---|
| 1 Cartesian coordinates of all compounds | 3 |
|------------------------------------------|---|

# 1 Cartesian coordinates of all compounds

Table S1: Cartesian coordinates of (1)

|   |          |          |          |
|---|----------|----------|----------|
| C | -5.63112 | 2.50470  | 0.24064  |
| C | -6.86706 | 1.95452  | 0.23744  |
| C | -7.05496 | 0.53842  | 0.16587  |
| C | -5.90332 | -0.29602 | 0.09747  |
| C | -4.61376 | 0.27295  | 0.10078  |
| C | -4.45402 | 1.69568  | 0.17296  |
| C | -3.18298 | 2.23589  | 0.17511  |
| C | -2.18485 | 0.01192  | 0.03665  |
| C | -3.47450 | -0.55704 | 0.03342  |
| C | -0.73217 | 1.96861  | 0.10991  |
| C | 0.37162  | 1.14810  | 0.04358  |
| C | 0.22757  | -0.23650 | -0.02658 |
| C | -1.03342 | -0.82264 | -0.03132 |
| C | -8.31588 | -0.04772 | 0.16104  |
| C | -8.45976 | -1.43218 | 0.08964  |
| C | -7.35610 | -2.25280 | 0.02370  |
| C | -6.05557 | -1.71299 | 0.02583  |
| C | -4.90525 | -2.52005 | -0.04047 |
| C | -3.63418 | -1.97973 | -0.03841 |
| C | -2.45713 | -2.78884 | -0.10558 |
| C | -1.22116 | -2.23866 | -0.10222 |
| H | 1.36320  | 1.58093  | 0.04581  |
| H | 1.10507  | -0.86837 | -0.07823 |
| C | -2.03261 | 1.42887  | 0.10841  |
| H | -0.61109 | 3.04294  | 0.16416  |
| H | -3.06342 | 3.31137  | 0.22963  |
| H | -5.51140 | 3.57940  | 0.29518  |
| H | -7.74525 | 2.58569  | 0.28946  |
| H | -2.57684 | -3.86356 | -0.15986 |
| H | -0.34292 | -2.86979 | -0.15384 |
| H | -5.02476 | -3.59554 | -0.09477 |
| H | -7.47750 | -3.32702 | -0.03148 |
| H | -9.19341 | 0.58385  | 0.21552  |
| H | -9.45151 | -1.86467 | 0.08507  |

Table S2: Cartesian coordinates of (2)

|   |           |           |           |
|---|-----------|-----------|-----------|
| C | -4.457967 | 2.346910  | 0.192449  |
| C | -5.679427 | 1.768562  | 0.151043  |
| C | -5.833157 | 0.346510  | 0.097318  |
| C | -4.659689 | -0.462472 | 0.088142  |
| C | -3.387315 | 0.133560  | 0.131127  |
| C | -3.260127 | 1.564558  | 0.184630  |
| C | -2.006925 | 2.134045  | 0.226247  |
| C | -0.829799 | 1.354299  | 0.218221  |
| C | 0.440259  | 1.922672  | 0.260146  |
| C | 1.599909  | 1.141654  | 0.251764  |
| C | 2.893425  | 1.709185  | 0.294084  |
| C | 4.011806  | 0.912734  | 0.284393  |
| C | 3.898602  | -0.479811 | 0.232423  |
| C | 2.654132  | -1.092321 | 0.189381  |
| C | 1.480664  | -0.283340 | 0.198587  |
| C | 0.208289  | -0.879377 | 0.155641  |
| C | -0.951786 | -0.075330 | 0.164882  |
| C | -2.227240 | -0.670487 | 0.121902  |
| C | -7.077626 | -0.265995 | 0.054199  |
| C | -7.190831 | -1.658539 | 0.002207  |
| C | -6.072451 | -2.454993 | -0.007437 |
| C | -4.778936 | -1.887466 | 0.034948  |
| C | -3.619285 | -2.668487 | 0.026596  |
| C | -2.349227 | -2.100116 | 0.068567  |
| C | -1.172100 | -2.879863 | 0.060561  |
| C | 0.081102  | -2.310375 | 0.102177  |
| C | 1.278942  | -3.092726 | 0.094375  |
| C | 2.500402  | -2.514375 | 0.135721  |
| H | 4.994095  | 1.365068  | 0.317267  |
| H | 4.790925  | -1.092614 | 0.225470  |
| H | 2.989524  | 2.786595  | 0.334434  |
| H | 0.533912  | 3.001187  | 0.300459  |
| H | -1.914461 | 3.212782  | 0.266534  |
| H | -4.364654 | 3.424856  | 0.232783  |
| H | -6.572987 | 2.379935  | 0.157928  |
| H | -7.969948 | 0.346810  | 0.061128  |
| H | -8.173119 | -2.110871 | -0.030723 |
| H | -6.168552 | -3.532403 | -0.047791 |
| H | -3.712940 | -3.747002 | -0.013692 |
| H | -1.264565 | -3.958602 | 0.020327  |
| H | 1.185628  | -4.170676 | 0.054124  |
| H | 3.393962  | -3.125748 | 0.128863  |

Table S3: Cartesian coordinates of (**3**)

|   |           |           |           |
|---|-----------|-----------|-----------|
| C | -4.130735 | 2.767944  | -0.388449 |
| C | -5.330936 | 2.147915  | -0.337249 |
| C | -5.434075 | 0.723549  | -0.238255 |
| C | -4.231733 | -0.042050 | -0.194104 |
| C | -2.982574 | 0.596454  | -0.246920 |
| C | -2.905820 | 2.029698  | -0.346105 |
| C | -1.674654 | 2.642399  | -0.396752 |
| C | -0.468722 | 1.907101  | -0.354629 |
| C | -0.541062 | 0.473246  | -0.255734 |
| C | -1.793126 | -0.164407 | -0.203153 |
| C | 0.775839  | 2.519805  | -0.405242 |
| C | 1.970049  | 1.783600  | -0.363122 |
| C | 1.898702  | 0.350357  | -0.264521 |
| C | 0.646637  | -0.287305 | -0.212058 |
| C | 3.225937  | 2.394775  | -0.413650 |
| C | 4.407303  | 1.656316  | -0.371374 |
| C | 4.337312  | 0.228028  | -0.273240 |
| C | 3.088149  | -0.410508 | -0.220858 |
| C | 5.683228  | 2.267321  | -0.422005 |
| C | 6.826701  | 1.511761  | -0.378254 |
| C | 6.761155  | 0.116540  | -0.282445 |
| C | 5.539653  | -0.537584 | -0.229311 |
| C | -6.655572 | 0.069473  | -0.184431 |
| C | -6.721115 | -1.325688 | -0.087779 |
| C | -5.577642 | -2.081242 | -0.043916 |
| C | -4.301721 | -1.470289 | -0.095255 |
| C | -3.120355 | -2.208754 | -0.053046 |
| C | -1.864471 | -1.597624 | -0.104192 |
| C | -0.670262 | -2.333849 | -0.062364 |
| C | 0.574297  | -1.721169 | -0.113321 |
| C | 1.780227  | -2.456497 | -0.071660 |
| C | 3.011392  | -1.843795 | -0.122297 |
| C | 4.236304  | -2.582075 | -0.080505 |
| C | 5.436508  | -1.962016 | -0.131277 |
| H | 7.793308  | 1.996172  | -0.418038 |
| H | 7.674422  | -0.463616 | -0.249119 |
| H | 5.741893  | 3.345593  | -0.496137 |
| H | 4.180928  | -3.660844 | -0.006437 |
| H | 6.351290  | -2.540210 | -0.098221 |
| H | 3.281905  | 3.474020  | -0.487881 |
| H | 1.726400  | -3.536039 | 0.002506  |
| H | 0.830186  | 3.599125  | -0.479659 |
| H | -0.724610 | -3.413174 | 0.011968  |
| H | -1.620828 | 3.721906  | -0.471439 |
| H | -3.176322 | -3.287973 | 0.021547  |
| H | -4.075363 | 3.846656  | -0.463342 |
| H | -6.245720 | 2.726075  | -0.370809 |
| H | -5.636305 | -3.159472 | 0.030835  |
| H | -7.568840 | 0.649617  | -0.217969 |
| H | -7.687718 | -1.810058 | -0.047420 |

Table S4: Cartesian coordinates of (4)

|   |           |           |           |
|---|-----------|-----------|-----------|
| C | -1.144300 | 0.990117  | -0.038359 |
| C | -2.369226 | 0.339368  | -0.052979 |
| C | -2.399848 | -1.100032 | -0.075082 |
| C | -1.189389 | -1.826773 | -0.081388 |
| C | 0.042566  | -1.151961 | -0.066325 |
| C | 0.072691  | 0.288771  | -0.044339 |
| C | 1.305643  | 0.938695  | -0.029744 |
| C | 2.515399  | 0.235727  | -0.035728 |
| C | 3.756400  | 0.884315  | -0.021149 |
| C | 4.956062  | 0.178741  | -0.027216 |
| C | 6.215287  | 0.827605  | -0.012586 |
| C | -3.596134 | 1.040527  | -0.046973 |
| C | -6.054394 | 1.094781  | -0.055588 |
| C | -7.236153 | 0.438652  | -0.070389 |
| C | -7.297706 | -0.991395 | -0.092760 |
| C | -6.073458 | -1.723337 | -0.099161 |
| C | -4.843783 | -1.047568 | -0.083883 |
| C | -4.808805 | 0.390740  | -0.061619 |
| C | -3.631937 | -1.774820 | -0.090210 |
| C | 1.253023  | -1.878706 | -0.072649 |
| C | 2.485115  | -1.203925 | -0.057638 |
| C | 4.926636  | -1.255427 | -0.049034 |
| C | 6.150880  | -1.987380 | -0.055436 |
| C | 7.352774  | -1.296756 | -0.040434 |
| C | 7.378878  | 0.103629  | -0.019124 |
| C | -8.499594 | -1.682022 | -0.108274 |
| C | -8.525686 | -3.082404 | -0.130052 |
| C | -7.362091 | -3.806371 | -0.136530 |
| C | -6.102872 | -3.157503 | -0.121388 |
| C | -4.903209 | -3.863064 | -0.127361 |
| C | -3.662214 | -3.214474 | -0.112380 |
| C | -2.452462 | -3.917432 | -0.118233 |
| C | -1.219514 | -3.267512 | -0.103416 |
| C | -0.002529 | -3.968858 | -0.109233 |
| C | 1.222394  | -3.318116 | -0.094565 |
| C | 2.449294  | -4.019284 | -0.100394 |
| C | 3.661968  | -3.369506 | -0.085869 |
| C | 4.907551  | -4.073562 | -0.091716 |
| C | 6.089318  | -3.417438 | -0.077270 |
| C | 3.696958  | -1.931187 | -0.063984 |
| H | -6.029950 | 2.177085  | -0.038705 |
| H | -8.167314 | 0.990990  | -0.065444 |
| H | -3.573470 | 2.123566  | -0.030236 |
| H | -1.121851 | 2.072956  | -0.021771 |
| H | 1.329121  | 2.021447  | -0.013231 |
| H | 3.781468  | 1.967083  | -0.004650 |
| H | 6.243236  | 1.909495  | 0.003925  |
| H | 8.331580  | 0.616240  | -0.007745 |
| H | 8.282288  | -1.851454 | -0.045305 |
| H | -9.429116 | -1.127338 | -0.103401 |
| H | -9.478385 | -3.595010 | -0.141868 |
| H | -7.390026 | -4.888255 | -0.153377 |
| H | -4.928264 | -4.945829 | -0.144087 |
| H | -2.475931 | -5.000185 | -0.134806 |
| H | -0.024976 | -5.051700 | -0.125708 |
| H | 2.426624  | -5.102328 | -0.116835 |
| H | 4.883093  | -5.155874 | -0.108138 |
| H | 7.020474  | -3.969785 | -0.082032 |

Table S5: Cartesian coordinates of (5)

|   |           |           |           |
|---|-----------|-----------|-----------|
| C | -6.961874 | 2.045071  | 0.000000  |
| C | -8.153240 | 1.368254  | 0.000001  |
| C | -5.729198 | 1.346130  | 0.000000  |
| C | -4.503134 | 2.002990  | -0.000000 |
| C | -3.287767 | 1.305000  | -0.000001 |
| C | -2.053117 | 1.958858  | -0.000002 |
| C | -0.843999 | 1.259785  | -0.000002 |
| C | 0.395191  | 1.911765  | -0.000002 |
| C | 1.599489  | 1.211907  | -0.000001 |
| C | 2.844143  | 1.863080  | -0.000001 |
| C | 4.041510  | 1.163255  | -0.000000 |
| C | 5.295632  | 1.814346  | 0.000000  |
| C | 6.481122  | 1.116215  | 0.000000  |
| C | 7.753974  | 1.769593  | 0.000002  |
| C | 8.908409  | 1.066403  | 0.000002  |
| C | -8.183185 | -0.032485 | 0.000002  |
| C | -7.010047 | -0.770813 | 0.000001  |
| C | -5.757167 | -0.088766 | 0.000000  |
| C | -4.555834 | -0.813344 | -0.000000 |
| C | -3.315220 | -0.135802 | -0.000001 |
| C | -2.111625 | -0.859385 | -0.000001 |
| C | -0.871916 | -0.182632 | -0.000001 |
| C | 0.331115  | -0.906161 | -0.000002 |
| C | 1.571151  | -0.229683 | -0.000001 |
| C | 2.774182  | -0.953217 | -0.000001 |
| C | 4.013893  | -0.276472 | -0.000000 |
| C | 5.217485  | -1.000068 | -0.000000 |
| C | 6.458102  | -0.322538 | 0.000000  |
| C | 7.659435  | -1.047133 | 0.000000  |
| C | 8.912317  | -0.365093 | 0.000001  |
| C | -7.006137 | -2.202316 | 0.000002  |
| C | -5.851697 | -2.905499 | 0.000001  |
| C | -4.578844 | -2.252111 | 0.000000  |
| C | -3.393353 | -2.950225 | -0.000000 |
| C | -2.139235 | -2.299131 | -0.000000 |
| C | -0.941868 | -2.998939 | -0.000001 |
| C | 0.302779  | -2.347772 | -0.000001 |
| C | 1.507078  | -3.047620 | -0.000001 |
| C | 2.746264  | -2.395654 | -0.000001 |
| C | 3.955384  | -3.094724 | -0.000001 |
| C | 5.190029  | -2.440885 | -0.000000 |
| C | 6.405397  | -3.138878 | -0.000000 |
| C | 7.631458  | -2.482038 | 0.000000  |
| C | 8.864135  | -3.180985 | 0.000000  |
| C | 10.055500 | -2.504176 | 0.000001  |
| C | 10.085456 | -1.103432 | 0.000001  |
| H | -9.084659 | 1.918711  | 0.000002  |
| H | -9.134122 | -0.549596 | 0.000003  |
| H | -6.946529 | 3.127335  | 0.000000  |
| H | -4.484751 | 3.086014  | -0.000001 |
| H | -2.033069 | 3.041777  | -0.000002 |
| H | 0.416363  | 2.994680  | -0.000002 |
| H | 2.865645  | 2.946076  | -0.000000 |
| H | 5.316640  | 2.897558  | 0.000000  |
| H | 7.773117  | 2.852138  | 0.000002  |
| H | 9.861019  | 1.580876  | 0.000002  |
| H | 11.036397 | -0.586334 | 0.000002  |
| H | 8.848779  | -4.263249 | -0.000000 |
| H | 10.986920 | -3.054633 | 0.000001  |
| H | 6.387004  | -4.221902 | -0.000001 |
| H | 3.935328  | -4.177646 | -0.000001 |
| H | 1.485900  | -4.130538 | -0.000001 |
| H | -0.963372 | -4.081936 | -0.000000 |
| H | -3.414357 | -4.033437 | 0.000000  |
| H | -5.870831 | -3.988044 | 0.000002  |
| H | -7.958747 | -2.716792 | 0.000003  |

Table S6: Cartesian coordinates of (**6**)

|   |           |           |           |
|---|-----------|-----------|-----------|
| C | -5.631729 | 2.463145  | 0.236136  |
| C | -6.857304 | 1.908411  | 0.230769  |
| C | -7.042970 | 0.494927  | 0.158913  |
| N | -5.907933 | -0.305142 | 0.093640  |
| C | -4.629628 | 0.279428  | 0.099520  |
| C | -4.478204 | 1.642094  | 0.169388  |
| C | -3.161047 | 2.190468  | 0.172600  |
| N | -2.187836 | 0.010979  | 0.036570  |
| C | -3.466141 | -0.573593 | 0.030746  |
| C | -0.725298 | 1.953007  | 0.111584  |
| C | 0.362360  | 1.155527  | 0.047156  |
| C | 0.209080  | -0.240771 | -0.024691 |
| C | -1.052804 | -0.789076 | -0.028944 |
| C | -8.304855 | -0.053380 | 0.154700  |
| C | -8.458127 | -1.449701 | 0.083250  |
| C | -7.370463 | -2.247195 | 0.019093  |
| C | -6.040631 | -1.704408 | 0.021536  |
| C | -4.934719 | -2.484640 | -0.042199 |
| C | -3.617565 | -1.936257 | -0.039159 |
| C | -2.464046 | -2.757293 | -0.106207 |
| C | -1.238475 | -2.202551 | -0.101000 |
| H | 1.353479  | 1.589706  | 0.050737  |
| H | 1.058355  | -0.903872 | -0.077176 |
| C | -2.055134 | 1.410234  | 0.108878  |
| H | -0.640878 | 3.028408  | 0.167619  |
| H | -3.033561 | 3.261492  | 0.227468  |
| H | -5.510767 | 3.537230  | 0.291142  |
| H | -7.750592 | 2.514297  | 0.280856  |
| H | -2.585010 | -3.831372 | -0.161329 |
| H | -0.345192 | -2.808422 | -0.151342 |
| H | -5.062201 | -3.555676 | -0.096855 |
| H | -7.454875 | -3.322616 | -0.036555 |
| H | -9.154134 | 0.609730  | 0.206989  |
| H | -9.449243 | -1.883887 | 0.079823  |



Table S7: Cartesian coordinates of (**7**)

|   |           |           |           |
|---|-----------|-----------|-----------|
| C | -4.450814 | 2.310950  | 0.191307  |
| C | -5.659615 | 1.731898  | 0.149960  |
| C | -5.813841 | 0.310910  | 0.096248  |
| N | -4.667570 | -0.467688 | 0.087768  |
| C | -3.395600 | 0.126034  | 0.130697  |
| C | -3.268035 | 1.511510  | 0.182629  |
| C | -1.995369 | 2.103537  | 0.225457  |
| C | -0.845767 | 1.349614  | 0.217856  |
| C | 0.466356  | 1.896166  | 0.259724  |
| C | 1.584811  | 1.120856  | 0.250813  |
| C | 2.898343  | 1.685773  | 0.293346  |
| C | 4.007798  | 0.911959  | 0.284309  |
| C | 3.882750  | -0.487009 | 0.231924  |
| C | 2.634819  | -1.056717 | 0.190351  |
| N | 1.488545  | -0.278124 | 0.198933  |
| C | 0.216574  | -0.871851 | 0.156082  |
| C | -0.955291 | -0.064435 | 0.165215  |
| C | -2.223735 | -0.681383 | 0.121580  |
| C | -7.061771 | -0.258792 | 0.054595  |
| C | -7.186822 | -1.657763 | 0.002268  |
| C | -6.077371 | -2.431583 | -0.006629 |
| C | -4.763838 | -1.866670 | 0.035961  |
| C | -3.645387 | -2.641986 | 0.027170  |
| C | -2.333260 | -2.095434 | 0.068999  |
| C | -1.183658 | -2.849358 | 0.061417  |
| C | 0.089008  | -2.257328 | 0.104198  |
| C | 1.271790  | -3.056765 | 0.095468  |
| C | 2.480593  | -2.477706 | 0.136676  |
| H | 4.988619  | 1.367128  | 0.317252  |
| H | 4.746541  | -1.133809 | 0.223278  |
| H | 2.962546  | 2.763562  | 0.333159  |
| H | 0.596273  | 2.968352  | 0.300455  |
| H | -1.927881 | 3.183738  | 0.265415  |
| H | -4.354690 | 3.388287  | 0.231709  |
| H | -6.566795 | 2.319422  | 0.155703  |
| H | -7.925561 | 0.388011  | 0.063176  |
| H | -8.167643 | -2.112930 | -0.030728 |
| H | -6.141576 | -3.509375 | -0.046384 |
| H | -3.775306 | -3.714175 | -0.013494 |
| H | -1.251146 | -3.929561 | 0.021524  |
| H | 1.175667  | -4.134104 | 0.055142  |
| H | 3.387774  | -3.065227 | 0.130874  |

Table S8: Cartesian coordinates of (**8**)

|   |           |           |           |
|---|-----------|-----------|-----------|
| C | -4.117579 | 2.738759  | -0.385949 |
| C | -5.303728 | 2.119774  | -0.334438 |
| C | -5.408240 | 0.694204  | -0.235404 |
| N | -4.237114 | -0.046163 | -0.193011 |
| C | -2.984243 | 0.579456  | -0.245175 |
| C | -2.903667 | 1.980786  | -0.342516 |
| C | -1.666751 | 2.606389  | -0.394613 |
| C | -0.475309 | 1.890647  | -0.353679 |
| C | -0.549818 | 0.477892  | -0.255529 |
| C | -1.799171 | -0.175016 | -0.201576 |
| C | 0.792303  | 2.520587  | -0.406294 |
| C | 1.953921  | 1.798742  | -0.364624 |
| C | 1.905091  | 0.367778  | -0.265297 |
| C | 0.655737  | -0.285140 | -0.211398 |
| C | 3.250487  | 2.375412  | -0.413809 |
| C | 4.393391  | 1.636096  | -0.370753 |
| N | 4.343033  | 0.238985  | -0.273560 |
| C | 3.090167  | -0.386667 | -0.221524 |
| C | 5.686196  | 2.243886  | -0.422147 |
| C | 6.821142  | 1.510769  | -0.379216 |
| C | 6.738386  | 0.108400  | -0.281198 |
| C | 5.514178  | -0.501309 | -0.230362 |
| C | -6.632458 | 0.084507  | -0.184581 |
| C | -6.715236 | -1.317934 | -0.087691 |
| C | -5.580307 | -2.051129 | -0.045563 |
| C | -4.287499 | -1.443336 | -0.096586 |
| C | -3.144594 | -2.182677 | -0.053864 |
| C | -1.848017 | -1.606023 | -0.102661 |
| C | -0.686383 | -2.327862 | -0.061100 |
| C | 0.581233  | -1.697922 | -0.113410 |
| C | 1.772698  | -2.413620 | -0.072344 |
| C | 3.009621  | -1.788004 | -0.124161 |
| C | 4.223547  | -2.545905 | -0.080060 |
| C | 5.409689  | -1.926851 | -0.130897 |
| H | 7.787087  | 1.995552  | -0.419744 |
| H | 7.623971  | -0.507647 | -0.244582 |
| H | 5.714200  | 3.321503  | -0.497259 |
| H | 4.163841  | -3.623983 | -0.005141 |
| H | 6.337199  | -2.480903 | -0.098832 |
| H | 3.351462  | 3.449292  | -0.488962 |
| H | 0.836601  | 3.600342  | -0.481337 |
| H | -1.634993 | 3.686967  | -0.469602 |
| H | -4.057865 | 3.816831  | -0.460926 |
| H | -6.231223 | 2.673887  | -0.365849 |
| H | -5.608324 | -3.128810 | 0.028623  |
| H | -7.518034 | 0.700613  | -0.220514 |
| H | -7.681192 | -1.802724 | -0.047450 |
| H | -3.245559 | -3.256394 | 0.020662  |
| H | -0.730740 | -3.407416 | 0.013556  |
| H | 1.740933  | -3.493989 | 0.002418  |

Table S9: Cartesian coordinates of (**9**)

|   |           |           |           |
|---|-----------|-----------|-----------|
| C | -1.136985 | 0.972521  | -0.045541 |
| C | -2.372324 | 0.305270  | -0.060917 |
| C | -1.189131 | -1.836637 | -0.088632 |
| C | 0.034547  | -1.149280 | -0.072896 |
| C | 0.058834  | 0.284774  | -0.050932 |
| C | 1.317153  | 0.943444  | -0.035502 |
| C | 2.495417  | 0.252668  | -0.040912 |
| C | 3.776310  | 0.863044  | -0.026099 |
| C | 4.937571  | 0.151887  | -0.031677 |
| C | 6.213151  | 0.796923  | -0.016233 |
| C | -3.591714 | 0.993891  | -0.055560 |
| C | -6.039675 | 1.060922  | -0.064265 |
| C | -7.206394 | 0.406280  | -0.078708 |
| C | -7.269213 | -1.026280 | -0.101249 |
| N | -6.077555 | -1.736642 | -0.107629 |
| C | -4.842464 | -1.079800 | -0.092431 |
| C | -4.802381 | 0.337068  | -0.070623 |
| C | 1.254768  | -1.872510 | -0.078635 |
| C | 2.491671  | -1.186523 | -0.062768 |
| N | 4.922950  | -1.249253 | -0.052908 |
| C | 6.114624  | -1.959602 | -0.058342 |
| C | 7.318702  | -1.314578 | -0.043226 |
| C | 7.367017  | 0.094665  | -0.021696 |
| C | -8.473278 | -1.671308 | -0.116191 |
| C | -8.521609 | -3.080546 | -0.138578 |
| C | -7.367755 | -3.782808 | -0.144945 |
| C | -6.092173 | -3.137767 | -0.129514 |
| C | -4.930918 | -3.848928 | -0.135677 |
| C | -3.649997 | -3.238558 | -0.120719 |
| C | -2.471780 | -3.929368 | -0.126295 |
| C | -1.213432 | -3.270743 | -0.110714 |
| C | -0.017663 | -3.958496 | -0.116023 |
| C | 1.217746  | -3.291303 | -0.100386 |
| C | 2.437138  | -3.979830 | -0.105356 |
| C | 3.647789  | -3.322929 | -0.089949 |
| C | 4.885086  | -4.046797 | -0.095309 |
| C | 6.051798  | -3.392150 | -0.080238 |
| C | 3.687903  | -1.906117 | -0.068345 |
| H | -8.149864 | 0.933586  | -0.073991 |
| H | -6.010424 | 2.142677  | -0.047466 |
| H | -3.586509 | 2.077514  | -0.039038 |
| H | -1.127437 | 2.056112  | -0.028954 |
| H | 1.335398  | 2.026534  | -0.018952 |
| H | 3.850225  | 1.941788  | -0.009518 |
| H | 6.211187  | 1.877463  | 0.000106  |
| H | 8.320404  | 0.604783  | -0.009713 |
| H | 8.221231  | -1.906931 | -0.048140 |
| H | 4.855822  | -5.128557 | -0.111721 |
| H | 6.995276  | -3.919454 | -0.083978 |
| H | 2.432080  | -5.063452 | -0.121790 |
| H | -0.027154 | -5.042088 | -0.132671 |
| H | -2.490078 | -5.012450 | -0.143172 |
| H | -5.004890 | -4.927662 | -0.152844 |
| H | -9.375820 | -1.078979 | -0.110504 |
| H | -9.475008 | -3.590643 | -0.150503 |
| H | -7.365815 | -4.863337 | -0.161987 |
| C | -3.646333 | -1.799369 | -0.098565 |
| C | -2.409350 | -1.113468 | -0.082733 |

Table S10: Cartesian coordinates of (10)

|   |           |           |           |
|---|-----------|-----------|-----------|
| C | -7.015668 | 2.035059  | -0.049302 |
| C | -8.195654 | 1.379387  | -0.057455 |
| C | -5.766163 | 1.340254  | -0.046913 |
| C | -4.579235 | 2.006516  | -0.038518 |
| C | -3.322639 | 1.347531  | -0.036098 |
| C | -2.119836 | 1.992170  | -0.027812 |
| C | -0.885592 | 1.286616  | -0.025757 |
| C | 0.332383  | 1.923737  | -0.017550 |
| C | 1.551550  | 1.212286  | -0.015549 |
| C | 2.781580  | 1.855980  | -0.007305 |
| C | 3.979752  | 1.141259  | -0.005501 |
| C | 5.231112  | 1.782887  | 0.002843  |
| C | 6.409800  | 1.080595  | 0.004595  |
| C | 7.676250  | 1.753710  | 0.013186  |
| C | 8.815066  | 1.052451  | 0.014751  |
| C | -8.200322 | -0.032387 | -0.063840 |
| C | -7.024369 | -0.724438 | -0.061855 |
| N | -5.804668 | -0.061133 | -0.053580 |
| C | -3.378223 | -0.092508 | -0.043047 |
| C | -2.164532 | -0.825403 | -0.041128 |
| C | -0.924398 | -0.152779 | -0.032613 |
| C | 0.273000  | -0.887285 | -0.030821 |
| C | 1.522193  | -0.219630 | -0.022301 |
| C | 2.719606  | -0.954140 | -0.020596 |
| C | 3.959755  | -0.281483 | -0.012196 |
| C | 5.173458  | -1.014384 | -0.010439 |
| C | 6.392146  | -0.343602 | -0.002138 |
| C | -7.019533 | -2.159105 | -0.068293 |
| C | -5.880759 | -2.860442 | -0.066526 |
| C | -4.614267 | -2.187454 | -0.058048 |
| C | -3.435568 | -2.889763 | -0.056141 |
| C | -2.184295 | -2.248147 | -0.047793 |
| C | -0.986035 | -2.962866 | -0.045912 |
| C | 0.243903  | -2.319245 | -0.037603 |
| C | 1.463168  | -3.030677 | -0.035665 |
| C | 2.681073  | -2.393593 | -0.027469 |
| C | 3.915399  | -3.099106 | -0.025482 |
| C | 5.118155  | -2.454442 | -0.017369 |
| C | 6.374802  | -3.113333 | -0.015100 |
| C | 7.561739  | -2.447128 | -0.006977 |
| C | 8.811344  | -3.142072 | -0.004959 |
| C | 9.991182  | -2.486182 | 0.003048  |
| C | 9.995606  | -1.074415 | 0.009671  |
| H | -9.128704 | 1.925672  | -0.059129 |
| H | -9.125248 | -0.589247 | -0.070229 |
| H | -6.970982 | 3.114839  | -0.044299 |
| H | -4.612057 | 3.087485  | -0.033611 |
| H | -2.097084 | 3.075316  | -0.022460 |
| H | 0.364537  | 3.007027  | -0.012389 |
| H | 2.813572  | 2.939356  | -0.002217 |
| H | 5.267582  | 2.866023  | 0.008030  |
| H | 7.690262  | 2.835833  | 0.018372  |
| H | 8.766443  | -4.221833 | -0.010168 |
| H | 10.924597 | -3.031851 | 0.004399  |
| H | 6.407710  | -4.194308 | -0.020003 |
| H | 3.892876  | -4.182259 | -0.030642 |
| H | 1.431087  | -4.113972 | -0.040860 |
| H | -1.018173 | -4.046242 | -0.051036 |
| H | -3.472201 | -3.972896 | -0.061176 |
| H | -5.895006 | -3.942568 | -0.071377 |
| H | -7.983664 | -2.647561 | -0.074598 |
| C | -4.596817 | -0.763285 | -0.051479 |
| N | 7.600037  | -1.045720 | -0.000281 |
| C | 8.819730  | -0.382284 | 0.007984  |
| H | 9.779227  | 1.540816  | 0.021180  |
| H | 10.920716 | -0.517845 | 0.016179  |
